# Independent evolution of ab- and adaxial stomatal density enables adaptation

Christopher D. Muir<sup>1,2</sup>, Miquel Àngel Conesa<sup>3</sup>, Jeroni Galmés<sup>3</sup>

<sup>1</sup> Department of Biology, Indiana University, Bloomington, IN 47405, USA

<sup>2</sup> Biodiversity Research Centre and Botany Department, University of British Columbia, Vancouver, British Columbia V6T 1Z4, Canada

<sup>3</sup> Research Group on Plant Biology under Mediterranean Conditions, Departament de Biologia, Universitat de les Illes Balears, Ctra. Valldemossa km 7.5, E-07122, Palma, Spain

*Author for correspondence:*

*Christopher D. Muir*

*Tel:* +17782284851

*Email:* [chrisdmuir@gmail.com](mailto:chrisdmuir@gmail.com)

University of British Columbia

6270 University Blvd.

Vancouver, BC, Canada

V6T 1Z4

Rapid report

Word count:

Summary: 190

Introduction: 713

Methods and Results: 1250

Discussion: 996

2 Figures and 2 Tables, 44 references

# Summary

- Are organisms free to reach their adaptive optima or constrained by hard-wired developmental programs? Recent evidence suggests that the arrangement of stomata on abaxial (lower) and adaxial (upper) leaf surfaces may be an important adaptation in plants, but stomatal traits on each surface likely share developmental pathways that could hamper evolution.
- We reviewed the quantitative genetics of stomatal density to look for loci that (1) affected ab- or adaxial density independently or (2) pleiotropically affected stomatal density on both surfaces. We also used phylogenetic comparative methods to test for independent versus correlated evolution of stomatal traits (density, size, and pore index) on each surface from 14 amphistomatous wild tomato taxa (*Solanum*; Solanaceae).
- Naturally occurring and laboratory-induced genetic variation alters stomatal density on one surface without affecting the other, indicating that development does not strongly constrain the spectrum of available mutations. Among wild tomato taxa, traits most closely related to function (stomatal pore index and density) evolved independently on each surface, whereas stomatal size was constrained by correlated evolution.
- Genetics and phylogenetics demonstrate mostly independent evolution of stomatal function on each leaf surface, facilitating largely unfettered access to fitness optima.

## 22 Keywords

23 Adaptation, correlated evolution, developmental constraint, phylogenetic compara-  
24 tive methods, quantitative genetics, *Solanum*, stomata, stomatal ratio

## 25 Introduction

26 Are traits able to evolve independently of one another or they constrained by de-  
27 velopment, genetic, or functional connections? Here, we examine whether stomata  
28 on the abaxial (‘lower’) surface of the leaf evolve independently of adaxial (‘upper’)  
29 stomata. Stomata are microscopic pores on the leaf surface formed by a pair of guard  
30 cells. The density, size, and arrangement of stomata on a leaf set the maximum stom-  
31 atal conductance to CO<sub>2</sub> diffusing into a leaf and the amount of water that transpires  
32 from it (Parkhurst, 1978; Sack et al., 2003; Franks and Farquhar, 2001; Galmés et al.,  
33 1975). Hence, stomatal traits like density, size, and ratio of upper to lower stomata  
34 have strong effects on carbon assimilation and water-use efficiency.

35 An unresolved question is whether stomatal size and density on each leaf surface  
36 can evolve independently or are tethered together by shared development. Stomata  
37 are most often found only on the lower leaf surface (hypostomy), but occur on both  
38 surfaces (amphistomy) in some species (Metcalf and Chalk, 1950; Parkhurst, 1978;  
39 Mott et al., 1984), especially herbs (Salisbury, 1927; Muir, 2015) and plants from  
40 open habitats (Mott et al., 1984; Gibson, 1996; Jordan et al., 2014). The proportion  
41 of stomata found on the upper surface also tends to increase during domestication,  
42 even as the total stomatal density stays constant (Milla et al., 2013). Amphistomy  
43 increases CO<sub>2</sub> diffusion within the leaf by opening up a second parallel pathway in

the intercellular airspace for diffusion from substomatal cavities to mesophyll cell walls. However, stomata on the upper surface in particular may be costly. For example, upper stomata increase the susceptibility to rust pathogens in *Populus* (McKown et al., 2014). Amphistomy may also cause the palisade mesophyll to dry out under strong vapor pressure deficits (Buckley et al., 2015). Muir (2015) reviewed the literature on other possible fitness costs.

It is tempting to explain the striking diversity in stomatal ratio as the result of natural selection optimally balancing the fitness costs and benefits. For this to be true, stomatal traits on both surfaces must be free to evolve independently. There are two reasons why independent evolution may be difficult. First, upper and lower stomata share developmental pathways, so mutations that alter the size or patterning on one surface could pleiotropically affect stomata on the other surface. Second, epidermal patterning may be tightly linked to, and therefore constrained by, overall ab-adaxial patterning in the leaf. In bifacial leaves with well differentiated spongy and palisade mesophyll layers ab-adaxial polarity is established very early in leaf development and required for blade outgrowth (Waites and Hudson, 1995; McConnell and Barton, 1998). If stomatal development is integrated into overall adaxial/abaxial patterning through shared regulatory pathways, then mutations that alter stomatal ratio could pleiotropically disrupt normal leaf development. Since spongy and palisade mesophyll layers specialize in CO<sub>2</sub> diffusion and light harvesting, respectively, to optimize carbon gain, such disruption could be deleterious. Hence, populations may be unable to respond to selection on stomatal ratio because of antagonistic pleiotropy, preventing them from reaching their adaptive optima.

Multiple reviews of stomatal development conclude that stomatal traits are independently controlled on each surface (Lake et al., 2002; Bergmann and Sack, 2007),

69 but there is little evidence for this claim. Nor is there strong evidence from the  
70 developmental literature for tight linkage between ab-adaxial polarity and stomatal  
71 development (Kidner and Timmermans, 2010; Pillitteri and Torii, 2012). To fill this  
72 gap, we use two complementary methods to directly test whether upper and lower  
73 stomatal traits can evolve independently. First, we reviewed the genetic literature  
74 for loci that effect stomatal density. If upper and lower stomatal densities can evolve  
75 independently, then we expected to find loci that specifically alter density on the  
76 upper or lower surface, but not both. Second, we took a phylogenetic comparative  
77 approach to ask whether upper and lower stomata evolve independently among a  
78 closely related group of wild tomato species (*Solanum* sect. *Lycopersicon* (Miller)  
79 Wettstein in Engler & Prantl, sect. *Lycopersicoides* (A. Child) Peralta, and sect.  
80 *Juglandifolia* (Rydberg) A. Child; Solanaceae) grown in a common garden. Both ge-  
81 netic and phylogenetic comparisons indicate that stomatal density on one leaf surface  
82 can evolve independently of density on the other surface. This implies that natural  
83 or artificial selection should be able to optimize the ratio of stomata on the upper  
84 and lower surface.

## 85 **Methods and Results**

### 86 **Genetics reveals partially independent control of ab- and adax-** 87 **ial stomatal density**

88 We reviewed the literature on quantitative trait locus (QTL) mapping and genome-  
89 wide association studies (GWAS) of stomatal traits within and between species. We  
90 searched broadly using Google Scholar and ISI Web of Knowledge, as well as by

91 looking through citations of and literature cited within studies we found. Seven  
 92 studies of four genera (*Brassica*, *Populus*, *Solanum*, *Oryza*) measured separate ab-  
 93 and adaxial stomatal trait loci (Table 1). Six used QTL mapping; one used GWAS.  
 94 We restricted our analysis to stomatal density because not all studies measured  
 95 stomatal size. We counted the number of loci that altered ab- or adaxial density,  
 96 but not both (‘independent loci’) and loci that altered ab- and adaxial density in the  
 97 same direction (‘shared loci’). For example, if two loci increased abaxial density and  
 98 two loci increased adaxial density, and one locus for each surface colocalized, then  
 99 we counted this as two independent loci (one abaxial, one adaxial) and one shared  
 100 locus. If reported, we also indicated whether the authors found a significant genetic  
 101 correlation between ab- and adaxial stomatal density across all genotypes. One study  
 102 measured stomatal QTL at both ambient and elevated [CO<sub>2</sub>] (Rae et al., 2006; Ferris  
 103 et al., 2002); we used only data from the ambient [CO<sub>2</sub>] treatment. In another study,  
 104 QTL were determined at two life stages (Laza et al., 2010); we counted QTL if they  
 105 affected density at one life stage or both. Finally, some studies measured QTL in  
 106 the same species (Ishimaru et al., 2001; Laza et al., 2010) or even the same lines  
 107 (Chitwood et al., 2013; Muir et al., 2014b), albeit under different conditions, and are  
 108 clearly not independent data points.

109 Genetic studies reveal some correlation between stomatal densities on each surface,  
 110 but in all cases there are loci which alter stomatal density on one surface indepen-  
 111 dently of the other (Table 1). In some cases, there was no detectable genetic corre-  
 112 lation between stomatal densities on each surface, which would optimally facilitate  
 113 adaptive evolution. However, with few studies it is difficult to generalize about how  
 114 strongly genetic covariation between stomatal traits on each surface would constrain  
 115 responses to selection on microevolutionary timescales. It is also difficult to predict

macroevolutionary constraints from genetic correlations within species, as genetic correlations themselves may evolve. Therefore, we next looked at macroevolutionary patterns of correlated evolution using a phylogenetic approach.

## **Stomatal pore area and density, but not size, evolve independently on each surface**

### **Stomatal trait measurements**

We measured stomatal density (SD) and guard cell length (GCL) from ab- and adaxial surfaces of 14 wild tomato species. Supporting Information Table S2 lists species names and Tomato Genetic Resource Center accession numbers of seed sources. There were 3-5 biological replicates per species, except the glabrous *S. chilense*, for which we could only get an accurate count from one replicate. Species were grown in a common garden at the experimental field at the University of the Balearic Islands, as described in Muir et al. (2015). We made polyvinylsiloxane (Kerr Extrude Medium, Orange, California, USA) casts of leaf surfaces from fully expanded adult leaves. We painted casts with a thin coat of nail polish and mounted this on a glass slide to count the number of stomata from three (proximal, medial, and distal) 0.571 mm<sup>2</sup> portions of the leaf area unobstructed by major veins. We measured average GCL on 20 stomata per portion, 60 stomata per leaf surface examined. For each leaf surface, we calculated Stomatal Pore Index (SPI) as  $SD \times GCL^2$ , where SD and GCL are in units of stomata per mm<sup>2</sup> and mm, respectively. SPI indicates what proportion of the leaf surface is occupied by stomatal pore and is closely related to maximum stomatal conductance (Sack et al., 2003). Total SD and SPI were calculated as the sum of ab- and adaxial values:

$$SD_{\text{tot}} = SD_{\text{ab}} + SD_{\text{ad}}$$

$$SPI_{\text{tot}} = SPI_{\text{ab}} + SPI_{\text{ad}}$$

The <sub>ab</sub> and <sub>ad</sub> subscripts denote stomatal traits values on the ab- and adaxial surface, respectively. We measured total leaf stomatal conductance to CO<sub>2</sub> ( $g_s$ ) under ambient CO<sub>2</sub> concentrations (400 ppm) using an open-path infrared gas exchange analyzer (LI-6400 or LI-6400XT, LI-COR Inc., Lincoln, NE, USA) as described in Muir et al. (2015). Stomatal conductance was measured under optimal conditions to approach maximum  $g_s$ . Steady-state measurements were taken at midday with saturating irradiance (photosynthetically active radiation set to 1500  $\mu\text{mol quanta m}^{-2} \text{s}^{-1}$ ), moderate relative humidity (40–60%), and 25°C leaf temperature.

## Phylogenetic methods

Stomatal traits on each surface clearly differ from one another (Figure 1). The abaxial (lower) surface of tomato leaves usually have higher stomatal density and stomatal pore index, but smaller guard cells. Although stomata from each surface clearly differ overall, shared developmental pathways may nevertheless constrain how stomatal traits on each surface evolve. We tested whether ab- and adaxial stomatal traits evolve independently using phylogenetic comparative methods. If ab- and adaxial traits can evolve independently, then phylogenetic models assuming zero covariance between traits should outperform models with covariance. Conversely, if ab- and adaxial stomatal traits share common developmental pathways that constrain their evolution, then models with positive covariance should outperform models without



covariance. To test this, we compared six models using the R package **mvMORPH** (Clavel et al., 2015). We used a maximum likelihood phylogenetic tree inferred from 18 genes (Haak et al., 2014) using RAxML version 8.1.24 (Stamatakis, 2014). All models allow separate average values for ab- and adaxial traits, but differ in two respects. First, we compared Brownian motion (BM) to Ornstein-Uhlenbeck (OU) models. In both BM and OU models, trait values evolve at rate  $\sigma$ . The only difference between BM and OU models is that the OU model includes an extra parameter (denoted  $\alpha$ ) that pulls species back faster toward the long-run average (denoted  $\theta$ ). Note that BM versus OU comparison only tests how tightly stomatal traits are constrained to evolve around the long-run average, not whether ab- and adaxial stomata evolve independently. We tested for independent evolution by comparing BM and OU models with and without evolutionary covariance between leaf surfaces. We compared two BM models for each trait, one in which  $\text{Cov}(\sigma_{\text{ab}}, \sigma_{\text{ad}})$  is estimated (‘covary’ model) and another with the constraint  $\text{Cov}(\sigma_{\text{ab}}, \sigma_{\text{ad}}) = 0$  (‘independent’ model). Similarly, we compared four OU models for each trait, three that allowed covariance between ab- and adaxial evolution and one in which they evolved independently. Specifically, we tested for covariance between diffusion rates ( $\text{Cov}(\sigma_{\text{ab}}, \sigma_{\text{ad}})$  estimated,  $\text{Cov}(\alpha_{\text{ab}}, \alpha_{\text{ad}}) = 0$ ), covariance between return rates ( $\text{Cov}(\alpha_{\text{ab}}, \alpha_{\text{ad}})$  estimated,  $\text{Cov}(\sigma_{\text{ab}}, \sigma_{\text{ad}}) = 0$ ), or covariance between both diffusion and return rates ( $\text{Cov}(\sigma_{\text{ab}}, \sigma_{\text{ad}})$  and  $\text{Cov}(\alpha_{\text{ab}}, \alpha_{\text{ad}})$  estimated). The ‘independent’ model constrained both  $\text{Cov}(\sigma_{\text{ab}}, \sigma_{\text{ad}}) = 0$  and  $\text{Cov}(\alpha_{\text{ab}}, \alpha_{\text{ad}}) = 0$ . We incorporated measurement error using the standard error across biological replicates within species (Pennell et al., 2015). Because we could not estimate measurement error for *S. chilense*, we used the average measurement from the other species instead. All traits were log-transformed for normality. We compared model fit using Akaike Information Criterion corrected for small sample size (AICc).

SD and SPI evolution are constrained but ab- and adaxial traits are uncorrelated. For both traits, OU models fit better than BM models, and models with covariance between leaf surfaces performed worse than those without covariance (Table S1). We found the opposite pattern for GCL. Evolution of this trait was best described by a model without constraint but including covariance between ab- and adaxial GCL. Since SPI<sub>tot</sub> is closely related to stomatal conductance in these species (Figure 2), independent evolution of SPI<sub>tot</sub> suggests little evolutionary constraint on how stomatal conductance is partitioned across surfaces in different species.

## Discussion

Adaptive evolution may be constrained if traits cannot evolve independently. In particular, if traits share developmental pathways, then they may be unable to respond differentially to selection. In this study, we examined whether stomata on the abaxial (lower) and adaxial (upper) surfaces can evolve independently. We adduce two new lines of evidence which suggest that stomatal function on each surface can readily respond to selection. First, species possess heritable variation that allows partially independent evolution of stomatal densities in response to selection; every study reviewed found loci which alter stomatal density on one surface but not the other. Second, the anatomical trait most closely connected to stomatal conductance, stomatal pore index (Sack et al., 2003), evolves independently on ab- and adaxial surfaces among wild tomato species. Together, these new lines of evidence demonstrate that natural selection on stomatal arrangement is not strongly constrained by development, although we lacked statistical power to detect weak constraint. It is therefore likely that variation in how stomatal conductance is partitioned between

207 leaf surfaces is due to adaptive rather than nonadaptive forces.

208 Indeed, much recent evidence indicates that selection finely tunes the ratio of stomata  
 209 on the upper and lower leaf surface, although the adaptive significance of variation in  
 210 stomatal ratio is unresolved. Stomatal ratio affects leaf function, increasing CO<sub>2</sub> dif-  
 211 fusion (Parkhurst, 1978; Parkhurst and Mott, 1990; Gutschick, 1984; Parkhurst, 1994)  
 212 and hydraulic conductance outside the xylem (Buckley et al., 2015). As predicted,  
 213 amphistomy seems to be more common in circumstances when efficient CO<sub>2</sub> supply  
 214 is important, such as high irradiance (Mott et al., 1984; Gibson, 1996; Smith et al.,  
 215 1997; Jordan et al., 2014), thick leaves (Parkhurst, 1978; Muir et al., 2014a), herba-  
 216 ceous growth form (Salisbury, 1927; Muir, 2015), and domestication (Milla et al.,  
 217 2013). Despite potential benefits of amphistomy, most plant species are hypostoma-  
 218 tous, implying a fitness cost of upper stomata, such as increased infection by foliar  
 219 pathogens (Gutschick, 1984; McKown et al., 2014). For example, ‘upside-down’ (re-  
 220 supinate) leaves with the abaxial surface facing upward have re-evolved hypostomy  
 221 (Lyshede, 2002), strongly implying a cost of upward facing stomata.

222 To optimally balance fitness costs and benefits, natural selection must be able to  
 223 change stomatal traits on one surface independently of the other. The present study  
 224 shows that this is likely true and strikingly consistent on micro- and macroevolu-  
 225 tionary timescales. Among *Populus trichocarpa* populations and *Solanum* species,  
 226 the ratio of adaxial to abaxial SPI (SPI ratio) evolves mostly by changes in stom-  
 227 atal density rather than guard cell size. Within *Populus*, populations are more am-  
 228 phistomatous at Northern latitudes with shorter growing seasons that may select for  
 229 faster carbon assimilation (McKown et al., 2014; Kaluthota et al., 2015). Latitudinal  
 230 variation *Populus trichocarpa* is due mostly to adaptive variation in adaxial stomatal  
 231 density (McKown et al., 2014; Porth et al., 2015). Stomatal density rather than size

may have responded more readily to selection because there is no genetic covariance between ab- and adaxial stomatal density, permitting independent evolution (Porth et al., 2015). In contrast ab- and adaxial guard cell length positively covary, likely constraining evolution. Similarly, we found that over macroevolutionary timescales most of the variation in SPI among wild tomato species is due to changes in adaxial stomatal density rather than size. Indeed, stomatal density on each surface evolved independently, whereas guard cell lengths positively covaried (Table S1). Adaptive evolution will likely take advantage of traits that evolve independently because this minimizes antagonistic pleiotropy. In a previous study, we found that loci affecting adaxial stomatal density were likely fixed by selection, but we did not measure stomatal size (Muir et al., 2014b). Overall, patterns within and between species indicate that selection on SPI ratio leads to greater change in stomatal densities rather sizes on each surface. Based on the analysis here, we conclude that changing stomatal density on one surface incurs less cost than changing size because the former is less constrained by shared developmental pathways.

We caution that there are limitations of our analysis. First, although some loci alter stomatal traits on one surface independently of the other, there are also loci that affect both surfaces, leading to significant genetic correlations in some species (Table 1). Such genetic correlations will slow adaptation even if they do not prevent populations from eventually reaching an adaptive optimum in the long run. For example, the relatively high genetic correlation between ab- and adaxial stomatal density in *Oryza* may contribute to low variation in stomatal ratio between species of this genus (Giuliani et al., 2013). Second, the sample size of the phylogenetic comparisons is small and thus not statistically powerful. However, simulations show that model identification (e.g. Brownian motion versus Ornstein-Uhlenbeck) is usu-

ally correct, even when sample sizes are moderate (Cressler et al., 2015; Ho and Ané, 2014). The dataset was also powerful enough to find significant correlated evolution of guard cell size on ab- and adaxial surfaces, which we interpret as evidence of shared developmental pathways. However, we cannot rule out some level of correlated evolution for stomatal density and pore index below our threshold to detect. Finally, stomatal traits measured in a common garden may be different than what occurs naturally. For example, the ratio of stomatal density and size changes in response to light (Gay and Hurd, 1975) and water stress (Galmés et al., 1975). Despite *ad libitum* watering and fertilizer, our common garden in a Mediterranean climate may have been more stressful for some tomato species than others, depending on their habitat of origin, perhaps inducing stress-response phenotypes.

We recommend that future genetic and comparative studies of stomatal traits report separate ab- and adaxial values for stomatal density and size. We also need to determine developmental connections between abaxial/adaxial pattern specification and epidermal development. For example, SPCH SILENT, an *Arabidopsis* mutant that relatively normal adaxial stomatal density but no abaxial stomata (Dow et al., 2014), suggesting possible links between SPCH and abaxial/adaxial patterning. The molecular mechanisms may explain how stomata often develop differently on each surface and why asymmetry between surfaces readily evolves.

## Acknowledgements

CDM was supported by an Evo-Devo-Eco Network (EDEN) research exchange (NSF IOS #0955517). The research was supported by project AGL2013-42364-R (Plan Nacional, Spain) and UIB Grant 15/2105 awarded to JG. We acknowledge Miquel

280 Tuyols and collaborators of the UIB Experimental Field and Greenhouses for their  
281 technical support. Matt Pennell provided feedback.

## 282 **Author contribution statement**

283 CDM, MAC, and JG designed and carried out the experiment. CDM analyzed the  
284 data and wrote the manuscript.

# References

- Bergmann, D. C. and F. D. Sack, 2007. Stomatal development. *Annu. Rev. Plant Biol.* 58:163–181.
- Buckley, T. N., G. P. John, C. Scoffoni, and L. Sack, 2015. How does leaf anatomy influence water transport outside the xylem? *Plant Physiology* 168:1616–1635.
- Chitwood, D. H., R. Kumar, L. R. Headland, A. Ranjan, M. F. Covington, Y. Ichihashi, D. Fulop, J. M. Jiménez-Gómez, J. Peng, J. N. Maloof, et al., 2013. A quantitative genetic basis for leaf morphology in a set of precisely defined tomato introgression lines. *The Plant Cell* 25:2465–2481.
- Clavel, J., G. Escarguel, and G. Merceron, 2015. mvmorph: an r package for fitting multivariate evolutionary models to morphometric data. *Methods in Ecology and Evolution* 6:1311–1319.
- Cressler, C. E., M. A. Butler, and A. A. King, 2015. Detecting adaptive evolution in phylogenetic comparative analysis using the Ornstein-Uhlenbeck model. *Systematic Biology* 64:953–968.
- Dow, G. J., J. A. Berry, and D. C. Bergmann, 2014. The physiological importance of developmental mechanisms that enforce proper stomatal spacing in *Arabidopsis thaliana*. *New Phytologist* 201:1205–1217.
- Ferris, R., L. Long, S. Bunn, K. Robinson, H. Bradshaw, A. Rae, and G. Taylor, 2002. Leaf stomatal and epidermal cell development: identification of putative quantitative trait loci in relation to elevated carbon dioxide concentration in poplar. *Tree Physiology* 22:633–640.
- Franks, P. J. and G. D. Farquhar, 2001. The effect of exogenous abscisic acid on

308 stomatal development, stomatal mechanics, and leaf gas exchange in *Tradescantia*  
309 *virginiana*. Plant Physiology 125:935–942.

310 Galmés, J., J. M. Ochogavía, J. Gago, E. J. Roldán, J. Cifre, and M. A. Conesa,  
311 1975. Leaf responses to drought stress in Mediterranean accessions of *Solanum ly-*  
312 *copersicum*: anatomical adaptations in relation to gas exchange parameters. Plant,  
313 Cell, & Environment 36:920–935.

314 Gay, A. and R. Hurd, 1975. The influence of light on stomatal density in the tomato.  
315 New Phytologist 75:37–46.

316 Gibson, A. C., 1996. Structure-Function Relations of Warm Desert Plants. Springer-  
317 Verlag, Berlin.

318 Giuliani, R., N. Koteyeva, E. Voznesenskaya, M. A. Evans, A. B. Cousins, and G. E.  
319 Edwards, 2013. Coordination of leaf photosynthesis, transpiration, and structural  
320 traits in rice and wild relatives (genus *Oryza*). Plant Physiology 162:1632–1651.

321 Gutschick, V. P., 1984. Photosynthesis model for C<sub>3</sub> leaves incorporating CO<sub>2</sub> trans-  
322 port, propagation of radiation, and biochemistry 2. ecological and agricultural  
323 utility. Photosynthetica 18:569–595.

324 Haak, D. C., B. A. Ballenger, and L. C. Moyle, 2014. No evidence for phylogenetic  
325 constraint on natural defense evolution among wild tomatoes. Ecology 95:1633–  
326 1641.

327 Hall, N., H. Griffiths, J. Corlett, H. Jones, J. Lynn, and G. King, 2005. Relation-  
328 ships between water-use traits and photosynthesis in *Brassica oleracea* resolved by  
329 quantitative genetic analysis. Plant Breeding 124:557–564.



- 330 Ho, L. S. T. and C. Ané, 2014. Intrinsic inference difficulties for trait evolution with  
331 Ornstein-Uhlenbeck models. *Methods in Ecology and Evolution* 5:1133–1146.
- 332 Ishimaru, K., K. Shirota, M. Higa, and Y. Kawamitsu, 2001. Identification of quanti-  
333 tative trait loci for adaxial and abaxial stomatal frequencies in *Oryza sativa*. *Plant*  
334 *Physiology and Biochemistry* 39:173–177.
- 335 Jordan, G. J., R. J. Carpenter, and T. J. Brodribb, 2014. Using fossil leaves as  
336 evidence for open vegetation. *Palaeogeography, Palaeoclimatology, Palaeoecology*  
337 395:168–175.
- 338 Kaluthota, S., D. W. Pearce, L. M. Evans, M. G. Letts, T. G. Whitham, and S. B.  
339 Rood, 2015. Higher photosynthetic capacity from higher latitude: foliar character-  
340 istics and gas exchange of southern, central and northern populations of *Populus*  
341 *angustifolia*. *Tree physiology* P. tpv069.
- 342 Kidner, C. A. and M. C. Timmermans, 2010. Chapter five - signaling sides: Adaxial -  
343 abaxial patterning in leaves. *Current Topics in Developmental Biology* 91:141–168.
- 344 Lake, J. A., F. I. Woodward, and W. P. Quick, 2002. Long-distance CO<sub>2</sub> signalling  
345 in plants. *Journal of Experimental Botany* 53:183–193.
- 346 Laza, M. R. C., M. Kondo, O. Ideta, E. Barlaan, and T. Imbe, 2010. Quantitative  
347 trait loci for stomatal density and size in lowland rice. *Euphytica* 172:149–158.
- 348 Lyshede, O. B., 2002. Comparative and functional leaf anatomy of selected Alstroee-  
349 meriaceae of mainly Chilean origin. *Botanical Journal of the Linnean Society*  
350 140:261–272.
- 351 McConnell, J. R. and M. K. Barton, 1998. Leaf polarity and meristem formation in  
352 *Arabidopsis*. *Development* 125:2935–2942.

- 353 McKown, A. D., R. D. Guy, L. Quamme, J. Klápště, J. La Mantia, C. Constabel,  
354 Y. A. El-Kassaby, R. C. Hamelin, M. Zifkin, and M. Azam, 2014. Association  
355 genetics, geography and ecophysiology link stomatal patterning in *Populus tri-*  
356 *chocarpa* with carbon gain and disease resistance trade-offs. *Molecular Ecology*  
357 23:5771–5790.
- 358 Metcalfe, C. R. and L. Chalk, 1950. *Anatomy of the dicotyledons*, Vols. 1 & 2. First  
359 ed. Oxford University Press, Oxford.
- 360 Milla, R., N. de Diego-Vico, and N. Martín-Robles, 2013. Shifts in stomatal traits  
361 following the domestication of plant species. *Journal of Experimental Botany*  
362 64:3137–3146.
- 363 Mott, K. A., A. C. Gibson, and J. W. O’Leary, 1984. The adaptive significance of  
364 amphistomatic leaves. *Plant, Cell & Environment* 5:455–460.
- 365 Muir, C. D., 2015. Making pore choices: repeated regime shifts in stomatal ratio.  
366 *Proc. R. Soc. B* 282:20151498.
- 367 Muir, C. D., M. Á. Conesa, E. Roldán, A. Molins, and J. Galmés, 2015. Surpris-  
368 ingly weak coordination between leaf structure and function among closely-related  
369 tomato species. *bioRxiv* P. 031328.
- 370 Muir, C. D., R. P. Hangarter, L. C. Moyle, and P. A. Davis, 2014a. Morphological  
371 and anatomical determinants of mesophyll conductance in wild relatives of tomato  
372 (*Solanum* sect. *Lycopersicon*, sect. *Lycopersicoides*; Solanaceae). *Plant, Cell &*  
373 *Environment* 37:1415–1426.
- 374 Muir, C. D., J. B. Pease, and L. C. Moyle, 2014b. Quantitative genetic analysis

- 375 indicates natural selection on leaf phenotypes across wild tomato species (*Solanum*  
376 sect. *Lycopersicon*; Solanaceae). Genetics 198:1629–1643.
- 377 Parkhurst, D. F., 1978. The adaptive significance of stomatal occurrence on one or  
378 both surfaces of leaves. The Journal of Ecology 66:367–383.
- 379 ———, 1994. Diffusion of CO<sub>2</sub> and other gases inside leaves. New Phytologist  
380 126:449–479.
- 381 Parkhurst, D. F. and K. A. Mott, 1990. Intercellular diffusion limits to CO<sub>2</sub> uptake  
382 in leaves studied in air and helox. Plant Physiology 94:1024–1032.
- 383 Pennell, M., R. G. FitzJohn, W. K. Cornwell, and L. J. Harmon, 2015. Model  
384 adequacy and the macroevolution of angiosperm functional traits. The American  
385 Naturalist 186:E33–E50.
- 386 Pillitteri, L. J. and K. U. Torii, 2012. Mechanisms of stomatal development. Annual  
387 Review of Plant Biology 63:591–614.
- 388 Porth, I., J. Klápště, A. D. McKown, J. La Mantia, R. D. Guy, P. K. Ingvarsson,  
389 R. Hamelin, S. D. Mansfield, J. Ehrling, C. J. Douglas, and Y. A. El-Kassaby,  
390 2015. Evolutionary quantitative genomics of *Populus trichocarpa*. PLoS ONE  
391 10:e0142864.
- 392 Rae, A. M., R. Ferris, M. J. Tallis, and G. Taylor, 2006. Elucidating genomic regions  
393 determining enhanced leaf growth and delayed senescence in elevated CO<sub>2</sub>. Plant,  
394 Cell & Environment 29:1730–1741.
- 395 Sack, L., P. Cowan, N. Jaikumar, and N. Holbrook, 2003. The ‘hydrology’ of leaves:  
396 co-ordination of structure and function in temperate woody species. Plant, Cell &  
397 Environment 26:1343–1356.

- 398 Salisbury, E., 1927. On the causes and ecological significance of stomatal frequency,  
399 with special reference to the woodland flora. Philosophical Transactions of the  
400 Royal Society of London. Series B 216:1–65.
- 401 Smith, W. K., T. C. Vogelmann, E. H. DeLucia, D. T. Bell, and K. A. Shepherd,  
402 1997. Leaf form and photosynthesis. BioScience 11:785–793.
- 403 Stamatakis, A., 2014. RAxML version 8: a tool for phylogenetic analysis and post-  
404 analysis of large phylogenies. Bioinformatics 30:1312–1313.
- 405 Waites, R. and A. Hudson, 1995. phantastica: a gene required for dorsoventrality of  
406 leaves in *Antirrhinum majus*. Development 121:2143–2154.

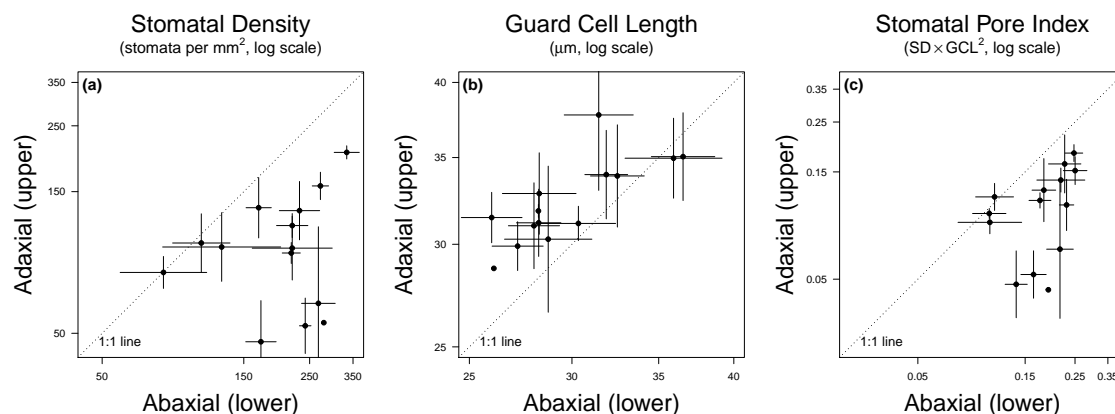

**Fig. 1.** Ab- and adaxial stomatal density (SD; panel (a)) and stomatal pore index (SPI; panel (c)) evolve independently, whereas the guard cell lengths (GCL; panel (b)), a measure of stomatal size, positively covaries over evolution. In horizontally-oriented tomato leaves, ab- and adaxial surfaces are the lower and upper surface, respectively. Adaxial SD and SPI values tend to be lower than abaxial ones (most points fall below 1:1 line), whereas adaxial stomata tend to be larger (higher GCL) than abaxial ones. Each point is mean trait value for one of 14 wild tomato species; lines are  $\pm$  one standard deviation. One species, *S. chilense*, was only sampled once and therefore the standard deviation could not be estimated.

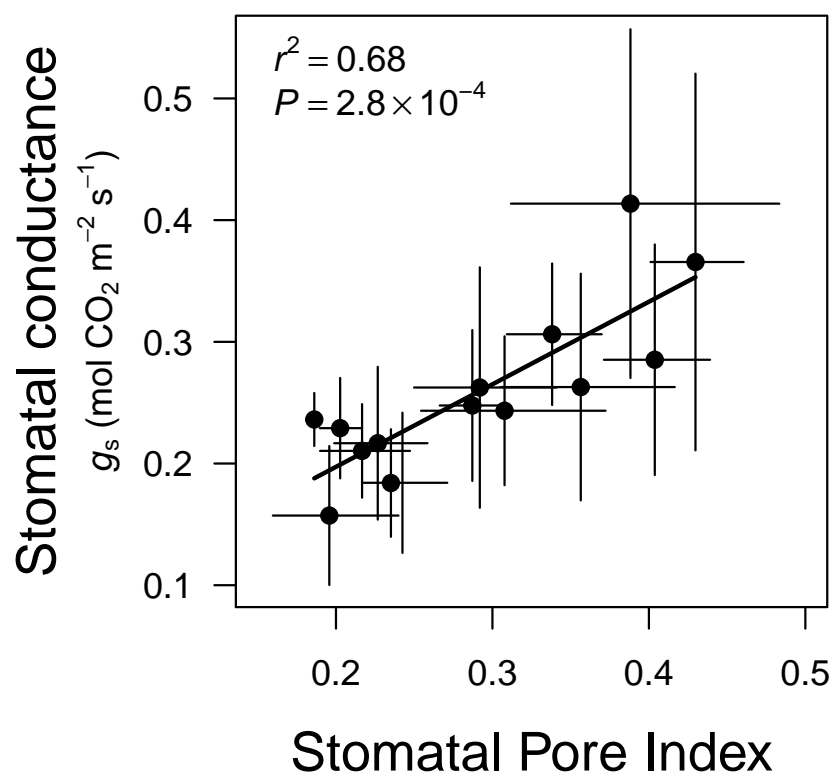

**Fig. 2.** Stomatal conductance to CO<sub>2</sub> ( $g_s$ ) is directly proportional to stomatal pore index (SPI) in wild tomato species.  $g_s$  was measured at ambient CO<sub>2</sub> concentrations (400  $\mu$ mol CO<sub>2</sub> mol<sup>-1</sup> air), saturating irradiance (1500  $\mu$ mol quanta m<sup>-2</sup> s<sup>-1</sup>), 25°C leaf temperature, and 40–60% relative humidity. Each point is the species mean; error bars are +/- one standard deviation.

**Table 1.** Many loci alter ab- or adaxial stomatal density independently, while others affect both surfaces. We reviewed seven studies (key to reference numbers below) in four genera. Loci were identified using quantitative trait locus mapping (QTL) or genome-wide association studies (GWAS). Shared loci altered both ab- and adaxial stomata density, whereas independent loci affected one or the other. The Data Source column refers to the table or figure in the reference where we found data. Muir et al. (2014b) did not report these analyses, but we calculated number of QTL using the same methods. We also indicate whether the study reported significant genetic correlation between ab- and adaxial stomatal density across all genotypes.

| Reference | Taxa                                                | Method | Shared loci | Independent loci | Data source            | Significant genetic correlation? |
|-----------|-----------------------------------------------------|--------|-------------|------------------|------------------------|----------------------------------|
| (1)       | <i>Brassica oleracea</i> L.                         | QTL    | 2           | 1                | Table 1                | not reported                     |
| (2, 3)    | <i>Populus trichocarpa</i> Torr. & A. Gray ex Hook. | GWAS   | 0           | 9                | Table 3 <sup>2</sup>   | no                               |
| (4)       | <i>Solanum</i> species                              | QTL    | 7           | 17               | unpub. result          | no                               |
| (5)       | <i>Solanum</i> species                              | QTL    | 7           | 14               | Supplemental Figure 10 | yes                              |
| (6, 7)    | <i>Populus</i> species                              | QTL    | 0           | 6                | Figure 4 <sup>7</sup>  | not reported                     |
| (8)       | <i>Oryza sativa</i> L.                              | QTL    | 1           | 2                | Table 1                | yes                              |
| (9)       | <i>Oryza sativa</i> L.                              | QTL    | 1           | 8                | Table 3                | yes                              |

<sup>1</sup> Hall et al. (2005); <sup>2</sup> McKown et al. (2014); <sup>3</sup> Porth et al. (2015); <sup>4</sup> Muir et al. (2014b); <sup>5</sup> Chitwood et al. (2013); <sup>6</sup> Ferris et al. (2002); <sup>7</sup> Rae et al. (2006); <sup>8</sup> Ishimaru et al. (2001); <sup>9</sup> Laza et al. (2010)

**Table 2.** Phylogenetic comparisons reveal independent evolution of ab- and adaxial stomatal density (SD) and stomatal pore index (SPI), but shared developmental pathways for ab- and adaxial guard cell length (GCL). We compared Brownian motion (BM) and Ornstein-Uhlenbeck (OU) models. Under the BM model, average trait values ( $\theta$ ) evolve without bounds at rate  $\sigma$ , whereas under the OU model, trait values are bounded.  $\alpha$  is the return rate toward  $\theta$  in the OU model. For both OU and BM models, we compared models with (‘covary’) and without (‘independent’) covariance between ab- and adaxial traits. We compared models using Akaike Information Criteria corrected for small sample size (AICc).  $\Delta\text{AICc}$  for a model is the difference its AICc and that of the model with lowest AICc. Hence, for the best-supported model  $\Delta\text{AICc} = 0$ .  $k$  is the number of parameters estimated for a particular model.

| Model | Model parameters |             |             | $k$ | $\Delta\text{AICc}$ |      |      |
|-------|------------------|-------------|-------------|-----|---------------------|------|------|
|       | $\theta$         | $\sigma$    | $\alpha$    |     | GCL                 | SD   | SPI  |
| BM1   | separate         | covary      | –           | 5   | 0                   | 6.5  | 7    |
| BM2   |                  | independent | –           | 4   | 10.1                | 11.8 | 12.4 |
| OU1   |                  | covary      | covary      | 8   | 19.9                | 13.4 | 14.9 |
| OU2   |                  | covary      | independent | 7   | 7.8                 | 7.5  | 5.5  |
| OU3   |                  | independent | covary      | 7   | 7.8                 | 3.3  | 4.6  |
| OU4   |                  | independent | independent | 6   | 13.1                | 0    | 0    |



## 407 Supporting Information

**Table S1.** Wild tomato species and Tomato Genetic Resource Center (TGRC) accession numbers.

| Species                                                                                          | TGRC Number |
|--------------------------------------------------------------------------------------------------|-------------|
| <i>S. arcanum</i> Peralta                                                                        | LA2153      |
| <i>S. cheesmaniae</i> (Riley) Fosberg                                                            | LA1035      |
| <i>S. chilense</i> Dunal                                                                         | LA1782      |
| <i>S. chmielewskii</i> D.M.Spooner, G.J.Anderson & R.K.Jansen                                    | LA1327      |
| <i>S. galapagense</i> S.C. Darwin & Peralta                                                      | LA0930      |
| <i>S. habrochaites</i> S. Knapp & D.M. Spooner                                                   | LA2196      |
| <i>S. lycopersicoides</i> Dunal                                                                  | LA2951      |
| <i>S. lycopersicum</i> var. <i>cerasiforme</i> (Dunal) D.M. Spooner, G.J. Anderson & R.K. Jansen | LA1320      |
| <i>S. neorickii</i> D.M. Spooner, G.J. Anderson & R.K. Jansen                                    | LA1322      |
| <i>S. pennellii</i> Correll                                                                      | LA1272      |
| <i>S. pennellii</i> var. <i>puberulum</i> Correll                                                | LA1926      |
| <i>S. peruvianum</i> L.                                                                          | LA2964      |
| <i>S. pimpinellifolium</i> L.                                                                    | LA0114      |
| <i>S. sitiens</i> I.M. Johnst.                                                                   | LA4115      |

**Stomatal Density**  
(stomata per mm<sup>2</sup>, log scale)

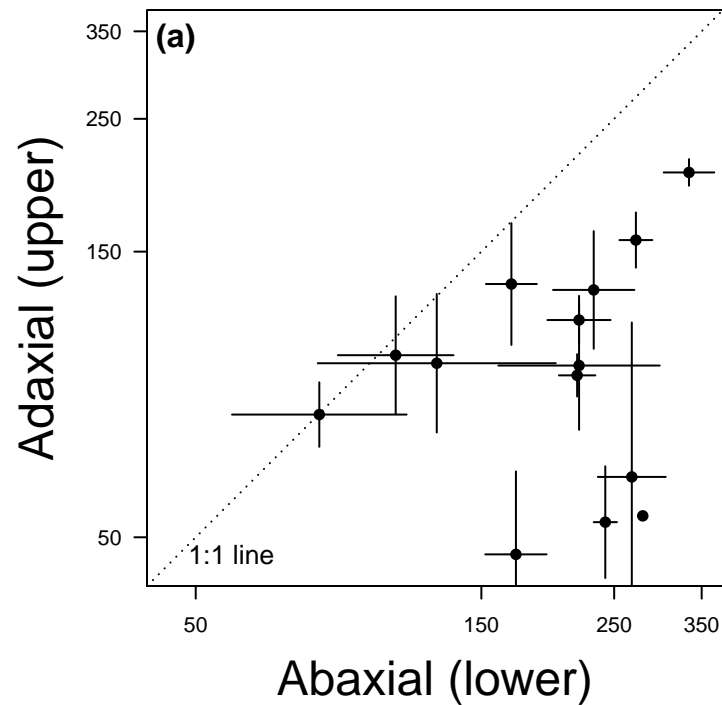

**Guard Cell Length**  
( $\mu\text{m}$ , log scale)

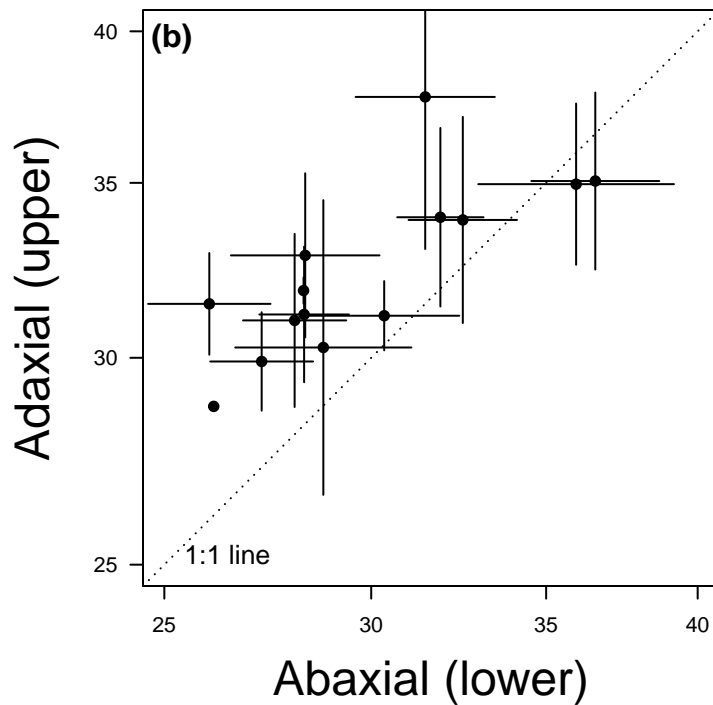

**Stomatal Pore Index**  
( $\text{SD} \times \text{GCL}^2$ , log scale)

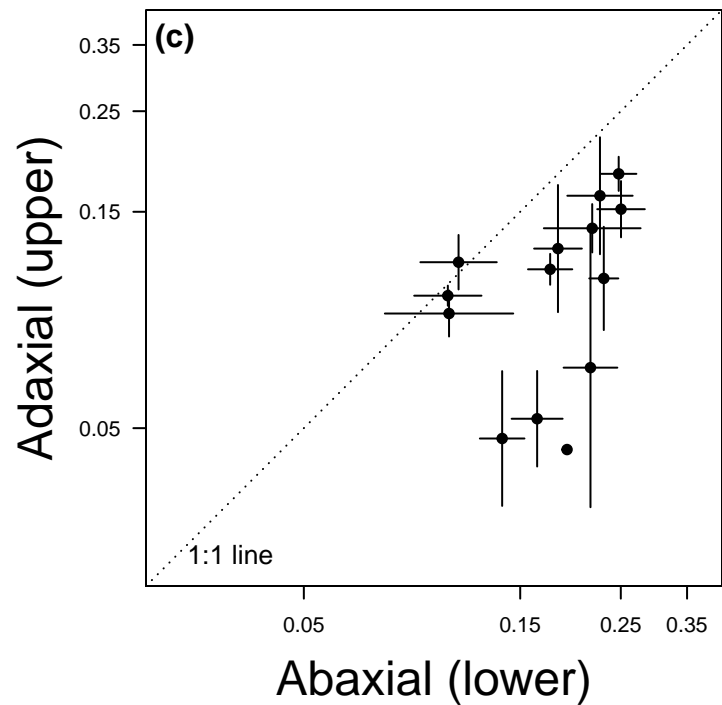

Stomatal conductance

$g_s$  (mol CO<sub>2</sub> m<sup>-2</sup> s<sup>-1</sup>)

0.5

0.4

0.3

0.2

0.1

$r^2 = 0.68$

$P = 2.8 \times 10^{-4}$

0.2

0.3

0.4

0.5

Stomatal Pore Index

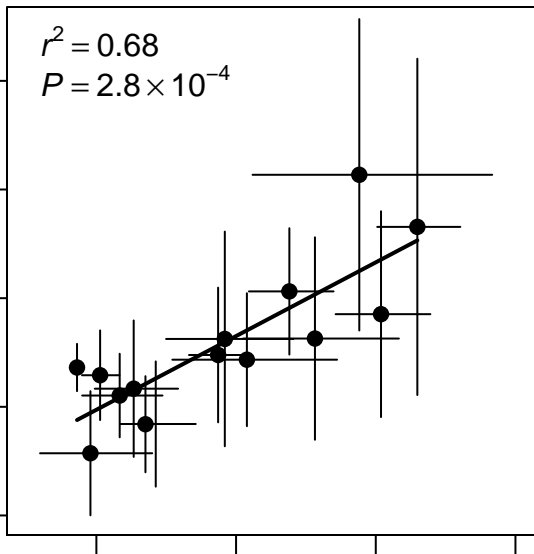

Source: http://www.biorxiv.org/content/10.1101/034355v1.full.pdf
